# Supplementary material
Source: PubMed Central journal article supplement (PMC4826039)
Supplement: NIHMS204847-supplement-Supp_1.pdf [file NIHMS204847-supplement-Supp_1.pdf]

Structure 16

## Supplemental Data

### Structure of the Kinesin13-Microtubule

### Ring Complex

Dongyan Tan, William J. Rice, and Hernando Sosa

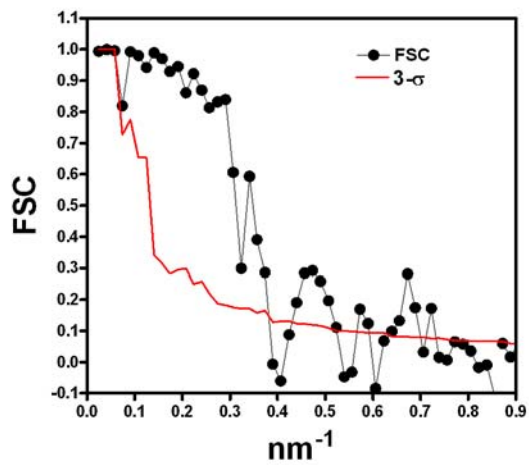

Supplemental Fig. 1

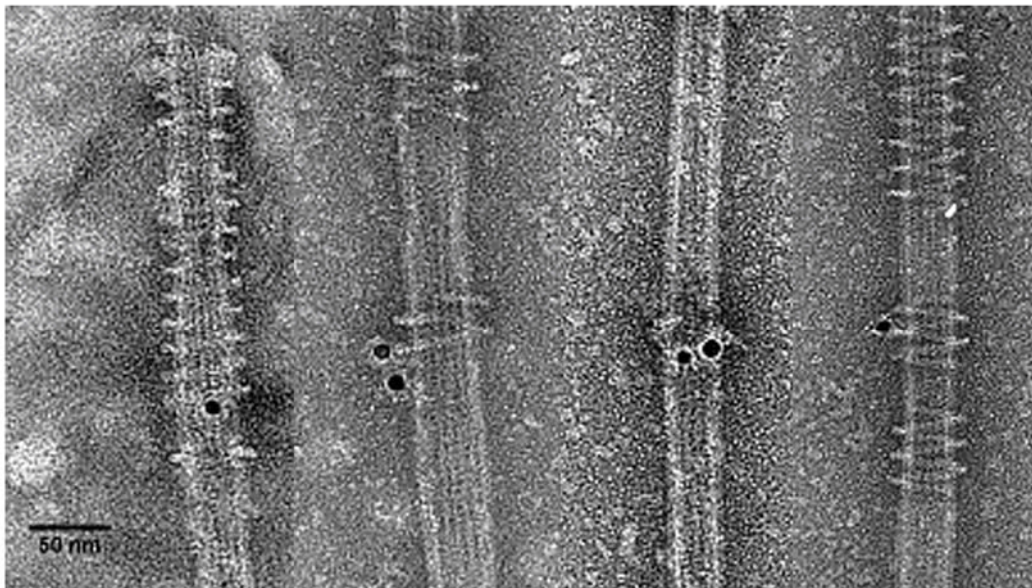

Supplemental Fig. 2
